1 **Prophylactic intranasal administration of a TLR2 agonist reduces**  
2 **upper respiratory tract viral shedding in a SARS-CoV-2 challenge**  
3 **ferret model**

4

5 **Authors:**

6 Pamela C. Proud<sup>1,6</sup>, Daphne Tsitoura<sup>2,6</sup>, Robert J. Watson<sup>1</sup>, Brendon Y Chua<sup>3</sup>, Marilyn  
7 J. Aram<sup>1</sup>, Kevin R. Bewley<sup>1</sup>, Breeze E. Cavell<sup>1</sup>, Rebecca Cobb<sup>1</sup>, Stuart Dowall<sup>1</sup>, Susan  
8 A. Fotheringham<sup>1</sup>, Catherine M. K. Ho<sup>1</sup>, Vanessa Lucas<sup>1</sup>, Didier Ngabo<sup>1</sup>, Emma  
9 Rayner<sup>1</sup>, Kathryn A. Ryan<sup>1</sup>, Gillian S. Slack<sup>1</sup>, Stephen Thomas<sup>1</sup>, Nadina I. Wand<sup>1</sup>, Paul  
10 Yeates<sup>1</sup>, Christophe Demaison<sup>2</sup>, David C. Jackson<sup>3</sup>, Nathan W. Bartlett<sup>4</sup>, Francesca  
11 Mercuri<sup>2,7</sup> and Miles W. Carroll<sup>1,5,7</sup>

12

13 **<sup>1</sup>National Infection Service, Public Health England (PHE), Porton Down,**  
14 **Salisbury, Wiltshire, United Kingdom SP4 0JG.**

15

16 **<sup>2</sup>Ena Respiratory, Level 9, 31 Queen St, Melbourne, Victoria, 3000, Australia.**

17

18 **<sup>3</sup>Department of Microbiology and Immunology, The University of Melbourne, at**  
19 **The Peter Doherty Institute for Infection and Immunity, 792 Elizabeth St,**  
20 **Melbourne, Victoria 3000, Australia**

21

22 **<sup>4</sup>Viral Immunology and Respiratory Disease group and Priority Research Centre**  
23 **for Healthy Lungs, University of Newcastle and Hunter Medical Research**  
24 **Institute, Newcastle, Australia**

25

26 **<sup>5</sup>Nuffield Dept of Medicine, Oxford University, Oxford, UK.**

27

28 <sup>6</sup>These authors contributed equally

29

30 <sup>7</sup>Joint Corresponding and senior authors

31

32

33

34 **Correspondence to:**

35

36 Professor Miles W. Carroll

37 National Infection Service

38 Public Health England (PHE)

39 Porton Down, Salisbury, Wiltshire, United Kingdom SP4 0JG

40 Email: miles.carroll@phe.gov.uk

41 Telephone: 01980 612100

42

43 Dr Francesca Mercuri

44 Director of Operations

45 Ena Respiratory

46 Level 9, 31 Queen St,

47 Melbourne, Victoria 3000, Australia

48 Email: fm@enarespiratory.com

49 Telephone: +61 411 403 241

50

51

52 **Abstract:**

53

54 Respiratory viruses such as coronaviruses represent major ongoing global threats,  
55 causing epidemics and pandemics with huge economic burden. Rapid spread of virus  
56 through populations poses an enormous challenge for outbreak control. Like all  
57 respiratory viruses, the most recent novel human coronavirus SARS-CoV-2, initiates  
58 infection in the upper respiratory tract (URT). Infected individuals are often  
59 asymptomatic, yet highly infectious and readily transmit virus. A therapy that restricts  
60 initial replication in the URT has the potential to prevent progression of severe lower  
61 respiratory tract disease as well as limiting person-to-person transmission.

62 We show that prophylactic intra-nasal administration of the TLR2/6 agonist INNA-051 in  
63 a SARS-CoV-2 ferret infection model effectively reduces levels of viral RNA in the nose  
64 and throat. The results of our study support clinical development of a therapy based on  
65 prophylactic TLR2/6 innate immune activation in the URT to reduce SARS-CoV-2  
66 transmission and provide protection against COVID-19.

67

68

69 **Keywords: Ferret; COVID-19; SARS-CoV-2; animal model; coronavirus; viral**  
70 **shedding; TLR-2; transmission; INNA-051.**

71 Coronaviruses (CoV) are pleomorphic, positive-sense, single-stranded RNA-enveloped  
72 viruses, members of the *Coronaviridae* family, that mainly infect wild animals and cause  
73 mild disease<sup>1</sup>. In addition, seven human CoVs that belong to either the  
74 Alphacoronavirus- or Betacoronavirus-genus have now been identified. Four of these  
75 human CoVs usually cause a mild, upper respiratory tract illness (common cold). Another  
76 three novel human CoVs have emerged in the past two decades through transmission  
77 to humans via an intermediate animal host<sup>2</sup>, and caused outbreaks of significant  
78 respiratory morbidity and mortality: in 2003, Severe Acute Respiratory Syndrome  
79 (SARS) CoV in China<sup>3</sup>, in 2012 Middle Eastern Respiratory Syndrome (MERS) CoV in  
80 Saudi Arabia<sup>4</sup> and more recently in December 2019, SARS-CoV-2, a novel CoV type  
81 identified in lower respiratory tract of patients presenting viral pneumonia in Wuhan,  
82 China<sup>5</sup>. Unlike the highly pathogenic SARS or MERS CoVs, SARS-CoV-2 infections  
83 have spread rapidly around the globe, causing broad spectrum respiratory symptoms,  
84 from very mild to severe, life-threatening disease (COVID-19) mostly in at risk  
85 populations such as the elderly and those with comorbidities.

86 As with other respiratory CoVs, SARS-CoV-2 primarily spreads via the airborne route,  
87 with respiratory droplets expelled by infected individuals<sup>6</sup>. Virus can be transmitted  
88 from symptomatic, as well as pre- or asymptomatic individuals<sup>7,8</sup>, with asymptomatic  
89 individuals being able to shed virus, and therefore being capable to transmit the disease,  
90 for longer than those with symptoms<sup>9</sup>. As with other respiratory viruses such as influenza,  
91 recent evidence suggests that, the epithelium of the upper respiratory tract (URT) is the  
92 initial site of SARS-CoV-2 infection<sup>10,11</sup>. This is consistent with the abundant nasal  
93 epithelial cell expression of the SARS-CoV-2 receptor, angiotensin-converting enzyme 2  
94 (ACE2) and its decreasing expression throughout the lower respiratory tract<sup>11</sup>.

95 A topical treatment of the URT that boosts anti-viral immunity and restricts viral replication  
96 is a promising method to promote viral clearance, reduce viral shedding and  
97 transmission. The TLRs are key microbe-recognition receptors with a crucial role in  
98 activation of host defence and protection from infections and therefore attractive drug  
99 targets against infectious diseases<sup>12-14</sup>. Synthetic agonists of the intracellular viral  
100 DNA/RNA-recognising TLR molecules, TLR3, TLR7/8 and TLR9, are capable of  
101 boosting protective innate immune responses against respiratory viruses. However,  
102 their success in the clinic has been limited, due to short-duration of benefit or induction  
103 of adverse effects, related to the release of pro-inflammatory cytokines and activation  
104 of the type-1 Interferon pathway<sup>15-18</sup>. TLRs expressed on the cell surface such as TLR2

105 offer an alternative approach. TLR2 dimerizes with TLR1 or TLR6 to recognize a broad  
106 variety of commensal and pathogenic microbial molecules and its activation is tightly  
107 regulated to maintain immune homeostasis<sup>19</sup>. A series of novel synthetic molecules,  
108 named the INNA compounds, have been developed with TLR2/6 agonist properties.  
109 Importantly, TLR2/6 agonists of the INNA compound series do not directly activate  
110 Type-1 interferons (unpublished data).

111 Airways administration of INNA compounds has been shown to protect from lethal  
112 influenza virus infection, prevent viral transmission and secondary bacterial  
113 superinfections in mouse disease models<sup>20-22</sup>. Intranasal (i.n.) treatment with INNA  
114 compounds also reduces viral load and lung inflammation in mouse models of  
115 rhinovirus infection (unpublished data). The demonstrated prophylactic benefit is  
116 associated with fast TLR2/6-mediated up-regulation of a series of innate immune  
117 response elements in airway epithelial cells, defined by early, rapid expression of NF-  
118  $\kappa$ B-regulated anti-microbial genes, including IFN- $\lambda$  and chemokines, that precede  
119 immune cell recruitment and support prolonged antiviral defence, suppresses viral  
120 load and virus-induced pulmonary inflammation (unpublished data).

121 To determine whether TLR2/6 agonists are also active against SARS-CoV-2, we used  
122 prophylactic i.n. administration of the novel compound INNA-051, in a SARS-CoV-2  
123 challenge ferret model<sup>23</sup>.

124 Ferret challenge models are commonly used to understand human respiratory virus-  
125 induced diseases and to evaluate the efficacy of related vaccines and drugs<sup>24,25</sup>. Use of  
126 ferrets is appropriate in the case of SARS-CoV-2 infection, as they express the virus  
127 entry ACE2 receptor in their airways<sup>26-28</sup> and SARS-CoV-2 i.n. inoculation in ferrets  
128 results in virus replication in the URT and dose-dependent viral shedding<sup>23,28</sup>.

129 In the present study, ferrets received two i.n. administrations of INNA-051 or vehicle-  
130 control (PBS), at 4 days before and 1 day prior to i.n. challenge with  $5.0 \times 10^6$  plaque-  
131 forming units (PFU) of SARS-CoV-2 in 1ml volume (day 0). Four groups (6  
132 animals/group) were used: Group 1 received two 1 ml doses (100 $\mu$ g/mL) INNA-051  
133 (high dose); Group 2 received two 1 ml doses (20 $\mu$ g/mL) INNA-051 doses (low dose);  
134 Group 3 received one 1ml dose (20 $\mu$ g/mL) INNA-051 at -4 days and one 1 ml dose  
135 INNA-051 (100 $\mu$ g/mL) at -1 day (mixed dose); Group 4 received two doses of vehicle  
136 (PBS) alone. After inoculation with SARS-CoV-2, ferrets were monitored for 12 days.  
137 In life samples were taken at days 1, 3, 5, 7, 10 and 12, with scheduled culls at days  
138 3 (n=6) and end of study days 12-14 (n=18) (Fig 1A).

139 Previous *in vivo* studies in mice have shown that respiratory application of INNA  
140 compounds have a good safety profile, without significant pro-inflammatory side  
141 effects or systemic cytokine release syndrome (unpublished data). Intranasal  
142 administration to ferrets of two doses of INNA-051, prior to SARS-CoV-2 challenge,  
143 did not induce observable or, measurable clinical signs of inflammation or changes in  
144 the animal's activity.

145 Assessment of body temperature revealed some variation between treatment groups  
146 (Fig 1B), with 2 of 6 ferrets in the INNA-051 high dose group 1 showing a transient  
147 increase of temperature  $>40.0^{\circ}\text{C}$ , only after the first, but not the second dose. No  
148 significant changes from baseline were noticed in body weight, with the variation  
149 among groups being less than 2% (Fig 1C).

150 It has been previously described that SARS-CoV-2 infection in ferrets is not associated  
151 with the development of severe symptomatology, but it represents a robust model of  
152 mild disease that allows the study of respiratory viral replication<sup>23,29</sup>. In this context, no  
153 obvious differences in clinical disease signs were observed among treatment groups  
154 in this experimental study. Assessment of body temperature (Fig 1B) and weight loss  
155 (Fig 1C) did not reveal significant variation between the INNA-051 and PBS-treated  
156 groups.

157 To follow the dynamics of SARS-CoV-2 viral replication and assess the impact of  
158 INNA-051 prophylactic treatment, nasal wash and throat swab samples were taken 4  
159 days before viral challenge and at 1, 3, 5, 7, 10 and 12-days post challenge (dpc).  
160 Analysis of viral RNA in nasal wash samples at 1 dpc confirmed infection in all  
161 treatment groups, with lower viral RNA levels detected in INNA-051 treatment Group  
162 3 (Fig. 2A). Reduction of viral RNA in treatment Group 3 was also evident at 3 dpc  
163 ( $p=0.0155$ ) (Fig. 2A). By 5 dpc, all INNA-051 treated groups had significantly ( $>10$ -  
164 fold) reduced viral RNA compared to the vehicle-control group (2-way ANOVA  
165 Dunnett's multiple comparison test: Group 1  $p=0.0244$ ; Group 2  $p=0.0107$ ; Group 3  
166  $p=0.0071$  compared to vehicle-control Group 4) (Fig 2A). On 5 dpc, the viral RNA  
167 levels in the nasal washes of the majority of INNA-051 treated animals remained low  
168 or below quantifiable limits throughout the course of infection. Viral RNA levels were  
169 found to be below the level of quantification in nasal washes of PBS-treated animals  
170 from 10 dpc onwards (Fig 2A).

171 Analysis of viral RNA in throat swabs provided further evidence of the capacity of  
172 INNA-051 treatment to reduce SARS-CoV-2 in the URT (Fig 2B). On 3 dpc lower viral

173 RNA levels were found in throat swabs of INNA-051 treated animals, with significantly  
174 greater reduction again observed ( $p=0.0345$ ) in INNA-051 treatment Group 3. By 5  
175 dpc, all groups treated with INNA-051 had significantly reduced ( $>10$  fold) viral RNA  
176 levels, compared to the vehicle control group (2-way ANOVA Dunnett's multiple  
177 comparison: Group 1  $p=0.0002$ , Group 2  $p=<0.0001$  and Group 3  $p=0.0039$  compared  
178 to vehicle control Group 4). Highly significantly reduction in viral RNA in the throat of  
179 INNA-051 treated animals was also apparent on 7 dpc (2-way ANOVA Dunnett's  
180 multiple comparison: Group 1  $p=0.0014$ , Group 2  $p=<0.0001$  and Group 3  $p=0.0002$   
181 compared to vehicle control Group 4), while by 10 dpc to the end of the study, the  
182 levels of viral RNA were below the limit of quantitation in all treatment groups (Fig 2B).  
183 Because all INNA-051 treatment groups exhibited reduced viral RNA in the nose and  
184 throat, we combined these groups into a single data set (supplementary figures) and  
185 compared to the group treated with vehicle. Using 2-way ANOVA Sidak's multiple  
186 comparison test, significant ( $>10$  fold) reduction in nasal viral RNA was observed at 5  
187 dpc ( $p=0.0057$ ) and highly significant ( $p<0.0001$ ), greater than 10-fold reduction in  
188 throat viral RNA was apparent from 5 to 7 dpc following INNA-051 i.n. treatment  
189 (Figure S1). Group 2 (20ug/mL) appears to be the most optimal dosing in this study  
190 After 5 days post-exposure to SARS-CoV-2, INNA-051 had statistically significant  
191 reduction of virus in throat swabs ( $p=<0.0001$ ) with 24 fold (96% reduction) and nasal  
192 wash ( $p=0.0107$ ) 15 fold (93% reduction) in this group compared to untreated animals.  
193 These results indicate a similar profile with the protective effects of natural acquired  
194 immunity in the ferret challenge model, as observed following re-challenge with SARS-  
195 CoV-2<sup>23</sup>.

196 To assess SARS-CoV-2 detected beyond the URT, lung tissue samples were  
197 collected, on scheduled cull day 3 (6/24 animals) and days 12-14 (18/24 animals) dpc  
198 and analysed for viral RNA levels. On day 3 dpc, two culled ferrets from the control  
199 vehicle group had detectable viral RNA levels ( $7.42 \times 10^4$  and  $2.86 \times 10^4$  copies/ml) (Fig  
200 2C). There was one ferret in Group 1 showing detectable, but below the quantifiable  
201 limit, viral RNA, and no other INNA-051 treated ferrets showing detectable viral RNA  
202 in lung tissue on day 3 and days 12-14 dpc

203 This study provides evidence supporting a novel approach to prevent SARS-CoV-2  
204 transmission, based on reduced viral shedding, following prophylactic i.n  
205 administration of INNA-051. Global efforts for prevention of SARS-CoV-2 infection  
206 have so far been mostly focused on social distancing and hygiene measures as well



207 as on R&D efforts for the development of vaccines. Our data demonstrate, for the first  
208 time, in an *in vivo* SARS-CoV-2 infection model, that INNA-051 is highly effective at  
209 reducing URT viral shedding, providing the potential to control virus transmission and  
210 COVID-19 disease.

211 TLR2 stimulation at mucosal surfaces triggers rapid up-regulation of protective, innate  
212 immune defence responses, and also activates counter-regulatory signalling that  
213 suppresses development of excessive inflammation and tissue damage and promotes  
214 the integrity of local epithelial barrier function<sup>30,31</sup>. In addition, the INNA compounds  
215 have been specifically designed to exert TLR2-mediated pharmacological activity on  
216 mucosal epithelium, without being systemically absorbed (Ena Respiratory  
217 unpublished data), a property that is expected to facilitate their development as safe,  
218 antiviral drug candidates. The lack of obvious clinical signs of inflammation following  
219 the administration of two doses of INNA-051 administered i.n supports this view.  
220 Histopathology from the study indicates that i.n. INNA-051 administration does not  
221 exacerbate SARS-CoV-2 pathology in the ferret lung in this setting (Figure S2).

222 It has been previously shown that i.n administration of an INNA compound in a mouse  
223 model of influenza triggers a cascade of innate immune signals that results in  
224 reduction of viral load, prevention of lower-respiratory infection and viral transmission  
225 between animals<sup>20-22</sup>. In a mouse rhinovirus infection model, we have shown that  
226 prophylactic treatment with an INNA compounds primes airway mucosal immunity  
227 providing prolong protection (unpublished data). Effective and accelerated anti-viral  
228 responses against rhinovirus have also been demonstrated following INNA compound  
229 treatment in an *in vitro* model of primary bronchial epithelial cells from healthy  
230 individuals and donors with asthma (unpublished data).

231 Although the ferret SARS-CoV-2 model has limitations and may not represent the severe  
232 spectrum of COVID-19 disease, our findings are highly encouraging and indicative of the  
233 potential impact i.n. administration of INNA-051 prophylactically may have against  
234 SARS-CoV-2 in humans. The fact that a significant reduction of URT viral RNA levels  
235 was observed in INNA-051-treated outbred ferrets during the peak of viral replication  
236 (5-7 days dpc) in this model<sup>23</sup> implies airway immunity priming and enhancement of  
237 antiviral host defence. The predictive value of antiviral effectiveness data from  
238 respiratory viral infection ferret models and translation into human infectious disease has  
239 been established<sup>25,32</sup>. For this reason, the SARS-CoV-2 ferret model has been used,  
240 during the current pandemic, to evaluate the therapeutic effect of a number of FDA-



241 approved/repurposed drugs including, lopinavir-ritonavir, hydroxychloroquine sulfate,  
242 or emtricitabine-tenofovir<sup>33</sup>. These drugs were found to have no or only modest (~4  
243 fold for emtricitabine-tenofovir) effect against SARS-CoV2 viral replication, as  
244 measured by viral titres in nasal wash from the ferrets<sup>33</sup>.

245 Substantial reduction of SARS-CoV viral shedding in the URT and therefore control of  
246 respiratory virus transmission may not be easily achievable without potentiation of  
247 airways antiviral immune defences<sup>34</sup>. Systemic antiviral drugs, as well as vaccines  
248 may not be effective in halting respiratory viral transmission even if they achieve  
249 suppression of clinical disease and in fact preliminary results from an experimental  
250 study with one of the leading SARS-CoV-2 vaccine candidates (an adenovirus-  
251 construct expressing SARS-CoV-2 spike protein) in non-human primates have shown  
252 little effect on the virus load in nasal washes<sup>35</sup>. To address these potential limitations,  
253 particularly during the urgent circumstances of an epidemic, parallel use of an i.n.  
254 administered innate immune modulator with the characteristics of INNA-051 may be  
255 highly appropriate to rapidly boost innate immunity at the primary site of respiratory  
256 infection which is protective within days of treatment. The use of i.n. INNA-051 for  
257 antiviral respiratory prophylaxis therefore offers several additional advantages,  
258 including fast-acting protection, and is in contrast to vaccines that take 2-4 weeks to  
259 mount a protective response. The limited risk for development of antiviral resistance,  
260 the option of self-administration and the non-prohibitive cost for large-scale  
261 manufacturing are also especially attractive factors.

262 In conclusion, this study provides evidence that prophylactic i.n. administration of the  
263 TLR2/6 agonist INNA-051 offers a promising approach for prevention and  
264 management of SARS-CoV-2 infection that can be used as a stand-alone method of  
265 antiviral prophylaxis and is complimentary to potential vaccination programs. This  
266 approach is particularly appealing to individuals at elevated risk of community  
267 transmission or development of severe disease, including front-line health care  
268 workers, vulnerable communities, the elderly, the immunocompromised and those  
269 with existing comorbidities.

270

271

## 272 **Funding Sources**

273 This work was funded by Ena Respiratory, Melbourne, Australia. The funders  
274 contributed to study design, interpretation, writing of the manuscript and the decision  
275 to publish.

276

## 277 **Contributions**

278 N.W.B, B.Y.C, C.D, D.C.J, F.M, P.P, D.T and M.W.C. contributed to the concept and  
279 design of the study.

280 P.P and D.T. wrote the manuscript.

281 N.W.B, B.Y.C, C.D, S.D, D.C.J, F.M. and M.W.C. provided critical review.

282 P.P co-ordinated the study and performed analysis on data generated.

283 J.D. and M.G.C. provided virus strain.

284 K.R.B. grew viral stock, provided challenge material and assisted with statistical  
285 analysis.

286 S.A.F and P.Y. managed all animal procedures.

287 B.E.C, R.C, C.M.K.H, V.L, D.N, K.A.R. and S.T. contributed to the processing of all  
288 animal samples at containment level 3.

289 E.R directed histology experiments and performed critical assessment of pathology.

290 M.J.A, N.I.W and R.J.W. performed the extraction and PCR of samples.

291 G.S performed quality control and analytical assistance on PCR data.

292

## 293 **Conflicts of Interest**

294 No conflicts of interest declared.

295

## 296 **Acknowledgements**

297 The authors gratefully acknowledge the support from the Biological Investigations  
298 Group at the National Infection Service, PHE, Porton Down, United Kingdom. Special  
299 thanks to Thomas Hender, Carrie Turner, Stephen Findlay-Wilson and Neil McLeod  
300 for assisting in providing RT-qPCR data for this work. The authors would like to  
301 express their gratitude to Jade Gouriet, Phillip Brown, Karen Gooch and Jemma  
302 Paterson for their help in processing of Containment Level 3 *in vivo* samples. The  
303 authors would like to thank Laura Hunter, Chelsea L. Kennard and Francisco J.  
304 Salguero for their contribution to the processing and critical review of pathology

305 tissues. The authors are grateful to Michael G. Catton and Julian Druce from Victorian  
306 Infectious Disease Reference Laboratory for the generous donation of the SARS-CoV-  
307 2 strain.

308

309

310

311

## 312 **Methods**

### 313 **Animals.**

314 Twenty-four healthy, female outbred ferrets (*Mustela putorius furo*) aged 6-8 months  
315 were obtained from a UK Home Office accredited supplier. The mean weight at the  
316 time of first INNA-051 treatment was 845g/ferret (range 740-1040g). Animals were  
317 housed in social groups of six prior to and post INNA-051 treatment at Advisory  
318 Committee on Dangerous Pathogens (ACDP) containment level 2. Animals were  
319 transferred to ACDP containment level 3 and housed in pairs post SARS-CoV-2  
320 challenge. Cages met with the UK Home Office *Code of Practice for the Housing and*  
321 *Care of Animals Bred, Supplied or Used for Scientific Procedures* (December 2014).  
322 Access to food and water was *ad libitum* and environmental enrichment was provided.  
323 All experimental work was conducted in accordance with and under the authority of a  
324 UK Home Office approved project licence that had been subject to local ethical review  
325 at PHE Porton Down by the Animal Welfare and Ethical Review Body (AWERB) as  
326 required by the *Home Office Animals (Scientific Procedures) Act 1986*. Animals were  
327 sedated by intramuscular injection of ketamine/xylazine (17.9 mg/kg and 3.6 mg/kg  
328 bodyweight) for administering of treatments, in-life sampling and viral challenge.

329

### 330 **INNA-051.**

331 INNA-051 belongs to a series of closely-related, pegylated synthetic analogues of the  
332 diacylated lipopeptide, S-[2,3-bis(palmitoyl oxy)propyl] cysteine (Pam<sub>2</sub>Cys) (INNA  
333 compound series), with selective TLR2/TLR6 agonist activity. Pam<sub>2</sub>Cys is inherently  
334 insoluble and has been rendered soluble by others through addition of the amino acid  
335 motif SK4<sup>36</sup>. Oligo lysine sequences have, however, been shown to be toxic, albeit at  
336 high concentration<sup>37</sup> and to modulate viral infection processes independent of TLR  
337 activation<sup>38</sup>. Any off-target effects were mitigated by incorporating polyethylene glycol  
338 as a solubilising agent, in the INNA compound series<sup>38</sup>. The EC<sub>50</sub>s for INNA-051 for  
339 the human TLR2/6 receptor is calculated at 40.1 pg/mL or ~19pM.

340 Freeze dried INNA-051 provided by Ena Respiratory, Melbourne, Australia was  
341 resuspended in phosphate buffered saline (PBS) (1mg/ml) and stored 2-8°C.  
342 Immediately prior to treatment, INNA-051 (1mg/ml) was further diluted in PBS to the  
343 required treatment doses; high dose (100µg/ml), low dose (20µg/ml) and mixed dose  
344 (20µg/ml first dose and 100µg/ml second dose).

345

346 **Inoculum.**

347 SARS-CoV-2 Victoria/01/2020<sup>39</sup> was generously provided by Peter Doherty Institute  
348 for Infection and Immunity, Melbourne, Australia at P1 and passaged twice in  
349 Vero/hSLAM cells [ECACC 04091501], obtained from the European Collection of  
350 Authenticated Cell Cultures (ECACC) PHE, Porton Down, UK. Whole genome  
351 sequencing was performed, on the challenge isolate, SISPA protocol and then  
352 sequenced using Nanopore as described previously<sup>40</sup>. Virus titre was determined by  
353 plaque assay on Vero/E6 cells [ECACC 85020206]. Challenge substance dilutions  
354 were conducted in Phosphate Buffer Saline (PBS). Challenge virus was delivered by  
355 intranasal instillation (1.0 ml total, 0.5 ml per nostril) at  $5.0 \times 10^6$  pfu/ml.

356

357 **Experimental Design.**

358 Experimental design and viral challenge dose were informed by a previous dose-  
359 dependent ferret study<sup>23</sup>. Prior to commencing the experiment, animals were randomly  
360 assigned to the four treatment groups, to minimise bias. A temperature/ID chip (Bio-  
361 Thermo Identichip, Animalcare Ltd, UK) was inserted subcutaneously into the dorsal  
362 cervical region of each animal.

363

364 INNA-051 was delivered by intranasal instillation (1.0 ml total, 0.5 ml per nostril) to  
365 three groups (n=6) of ferrets 4 days and 1 day prior to challenge. On each day, group  
366 1 received a high dose [100µg/ml], group 2 a low dose [20µg/ml] and group 3 received  
367 a 20µg/ml dose 4 days prior to challenge and a 100µg/ml] dose 1 day before challenge.  
368 PBS was delivered to control group ferrets (n=6) 4 days and 1 day prior to challenge.  
369 Two ferrets each from the high dose, low dose and control groups were scheduled for  
370 euthanasia on day 3 (n=6). Remaining ferrets (n=18) were scheduled for euthanasia  
371 on days 12-14; high and low dose [day 12 n=1, day 13 n=2, day 14 n=1], mixed dose  
372 [n=2 days 12-14] and control [n=2 days 12 and 14].

373

374 Nasal washes and throat swabs for all ferrets were taken prior to first treatment, at  
375 days 1 and 3 pc (n=24) and at days 5, 7, 10 and 12 pc for surviving ferrets (n=18). At  
376 necropsy, tissue samples were taken for histopathology and analysed by PCR. Nasal  
377 washes were obtained by flushing the nasal cavity with 2 ml PBS. Cotton throat swabs  
378 (Koehler Technische Produkten, VWR) were gently stroked across the back of the

379 pharynx in the tonsillar area and retained in viral transport media (VTM). Throat swabs  
380 were processed, and aliquots were stored in AVL at -80°C until assay.

381

### 382 **Clinical and euthanasia observations.**

383 Animals were monitored for clinical signs of disease twice daily (approximately 8 hours  
384 apart) for the entirety of the experiment. Clinical signs of disease were assigned a  
385 score based upon the following criteria. Activity was scored as follows; 0 = alert and  
386 playful, 1 = alert, playful when stimulated, 2 = alert, not playful when stimulated, 3 =  
387 not alert or playful. No clinical signs were noted throughout the experiment. To meet  
388 the requirement of the project license, immobility, neurological signs or a sudden drop  
389 in temperature were predetermined automatic euthanasia criteria. Animals were also  
390 deemed to have reached a humane endpoint if their body weight was at or below 30%  
391 baseline. If any ferret reached any of these three criteria, they were to be immediately  
392 euthanised using a UK Home Office approved Schedule 1 procedure. No animals  
393 reached these end-points during this study.

394

395 Temperature was taken using a microchip reader and implanted temperature/ID chip.  
396 Temperature was recorded at each clinical scoring point using the chip to ensure any  
397 peak of fever was recorded. Animals were weighed at the same time each day  
398 throughout the experiment.

399

### 400 **Necropsy Procedures.**

401 Ferrets were anaesthetised with ketamine/xylazine (17.9 mg/kg and 3.6 mg/kg  
402 bodyweight) and exsanguination was effected via cardiac puncture, followed by  
403 injection of an anaesthetic overdose (sodium pentobarbitone Dolelethal, Vetquinol UK  
404 Ltd, 140 mg/kg). A necropsy was performed immediately after confirmation of death.  
405 The left lung was dissected and used for subsequent virology procedures.

406

### 407 **RNA Extraction.**

408 RNA was isolated from nasal wash, throat swabs, EDTA treated whole blood, BAL  
409 and lung tissue. Weighed lung tissue was homogenised and inactivated in RLT  
410 (Qiagen) supplemented with 1%(v/v) Beta-mercaptoethanol. Tissue homogenate was  
411 then centrifuged through a QIAshredder homogenizer (Qiagen) and supplemented  
412 with ethanol as per manufacturer's instructions. Non-tissue samples were inactivated

413 in AVL (Qiagen) and ethanol. Downstream extraction on all inactivated samples was  
414 then performed using the BioSprint™96 One-For-All vet kit (Indical) and Kingfisher  
415 Flex platform as per manufacturer's instructions.

416

#### 417 **Quantification of Viral Loads by RT-qPCR.**

418 Reverse transcription-quantitative polymerase chain reaction (RT-qPCR) targeting a  
419 region of the SARS-CoV-2 nucleocapsid (N) gene was used to determine viral loads  
420 and was performed using TaqPath™ 1-Step RT-qPCR Master Mix, CG (Applied  
421 Biosystems™), 2019-nCoV CDC RUO Kit (Integrated DNA Technologies) and  
422 QuantStudio™ 7 Flex Real-Time PCR System. Sequences of the N1 primers and  
423 probe were: 2019-nCoV\_N1-forward, 5' GACCCCAAATCAGCGAAAT 3'; 2019-  
424 nCoV\_N1-reverse, 5' TCTGGTACTGCCAGTTGAATCTG 3'; 2019-nCoV\_N1-probe,  
425 5' FAM-ACCCCGCATTACGTTTGGTGGACC-BHQ1 3'. The cycling conditions were:  
426 25°C for 2 minutes, 50°C for 15 minutes, 95°C for 2 minutes, followed by 45 cycles of  
427 95°C for 3 seconds, 55°C for 30 seconds. The quantification standard was *in vitro*  
428 transcribed RNA of the SARS-CoV-2 N ORF (accession number NC\_045512.2) with  
429 quantification between  $1 \times 10^1$  and  $1 \times 10^6$  copies/ $\mu$ l. Positive samples detected below  
430 the lower limit of quantification (LLOQ) were assigned the value of 5 copies/ $\mu$ l, whilst  
431 undetected samples were assigned the value of  $< 2.3$  copies/ $\mu$ l, equivalent to the  
432 assays lower limit of detection (LLOD).

433

#### 434 **Histopathological Analysis.**

435 Samples from the left cranial and left caudal lung lobe together with nasal cavity, were  
436 fixed by immersion in 10% neutral-buffered formalin and processed routinely into  
437 paraffin wax. Nasal cavity samples were decalcified using an EDTA-based solution  
438 prior to embedding. 4  $\mu$ m sections were cut and stained with haematoxylin and eosin  
439 (H&E) and examined microscopically. In addition, samples were stained using the  
440 RNAscope technique to identify the SARS-CoV-2 virus RNA. Briefly, tissues were pre-  
441 treated with hydrogen peroxide for 10 minutes (room temperature), target retrieval for  
442 15 mins (98-101°C) and protease plus for 30 mins (40°C) (Advanced Cell Diagnostics).  
443 A V-nCoV2019-S probe (Cat No. 848561, Advanced Cell Diagnostics) was incubated  
444 on the tissues for 2 hours at 40°C. Amplification of the signal was carried out following  
445 the RNAscope protocol using the RNAscope 2.5 HD Detection kit – Red (Advanced  
446 Cell Diagnostics).



447

448 **Statistical analysis.**

449 Virology data were compared by two-way ANOVA with Dunnett's multiple comparisons  
450 test and two-way ANOVA with Sidak's multiple comparisons test. Transformed values  
451 fitted to a straight line in a QQ plot confirming normal distributions for comparison. A  
452 p-value <0.05 was considered statistically significant. Statistical analyses were  
453 performed using GraphPad Prism, version 8.4.2.

454

455

456

## 457 **References**

458

459 1 Cui, J., Li, F. & Shi, Z.-L. Origin and evolution of pathogenic coronaviruses.  
460 *Nature Reviews Microbiology* **17**, 181-192, doi:10.1038/s41579-018-0118-9  
461 (2019).

462 2 Li, X. *et al.* Evolutionary history, potential intermediate animal host, and cross-  
463 species analyses of SARS-CoV-2. *Journal of Medical Virology* **92**,  
464 doi:10.1002/jmv.25731 (2020).

465 3 Zhong, N. S. *et al.* Epidemiology and cause of severe acute respiratory  
466 syndrome (SARS) in Guangdong, People's Republic of China, in February,  
467 2003. *The Lancet* **362**, 1353-1358, doi:10.1016/S0140-6736(03)14630-2  
468 (2003).

469 4 Zaki, A. M., van Boheemen, S., Bestebroer, T. M., Osterhaus, A. D. M. E. &  
470 Fouchier, R. A. M. Isolation of a Novel Coronavirus from a Man with Pneumonia  
471 in Saudi Arabia. *New England Journal of Medicine* **367**, 1814-1820,  
472 doi:10.1056/NEJMoa1211721 (2012).

473 5 Lu, R. *et al.* Genomic characterisation and epidemiology of 2019 novel  
474 coronavirus: implications for virus origins and receptor binding. *The Lancet* **395**,  
475 565-574, doi:10.1016/S0140-6736(20)30251-8 (2020).

476 6 Tay, M. Z., Poh, C. M., Rénia, L., MacAry, P. A. & Ng, L. F. P. The trinity of  
477 COVID-19: immunity, inflammation and intervention. *Nature Reviews*  
478 *Immunology* **20**, 363-374, doi:10.1038/s41577-020-0311-8 (2020).

479 7 Hu, Z. *et al.* Clinical characteristics of 24 asymptomatic infections with COVID-  
480 19 screened among close contacts in Nanjing, China. *Science China. Life*  
481 *sciences* **63**, 706-711, doi:10.1007/s11427-020-1661-4 (2020).

482 8 Zou, L. *et al.* SARS-CoV-2 Viral Load in Upper Respiratory Specimens of  
483 Infected Patients. *New England Journal of Medicine* **382**, 1177-1179,  
484 doi:10.1056/NEJMc2001737 (2020).

485 9 Long, Q.-X. *et al.* Clinical and immunological assessment of asymptomatic  
486 SARS-CoV-2 infections. *Nature Medicine*, doi:10.1038/s41591-020-0965-6  
487 (2020).

- 488 10 Richard, M. *et al.* Influenza A viruses are transmitted via the air from the nasal  
489 respiratory epithelium of ferrets. *Nature communications* **11**, 766,  
490 doi:10.1038/s41467-020-14626-0 (2020).
- 491 11 Hou, Y. J. *et al.* SARS-CoV-2 Reverse Genetics Reveals a Variable Infection  
492 Gradient in the Respiratory Tract. *Cell*, doi:10.1016/j.cell.2020.05.042 (2020).
- 493 12 Hennessy, E. J., Parker, A. E. & O'Neill, L. A. Targeting Toll-like receptors:  
494 emerging therapeutics? *Nature reviews. Drug discovery* **9**, 293-307,  
495 doi:10.1038/nrd3203 (2010).
- 496 13 Hedayat, M., Netea, M. G. & Rezaei, N. Targeting of Toll-like receptors: a  
497 decade of progress in combating infectious diseases. *The Lancet. Infectious*  
498 *diseases* **11**, 702-712, doi:10.1016/s1473-3099(11)70099-8 (2011).
- 499 14 Patel, M. C. *et al.* Novel drugs targeting Toll-like receptors for antiviral therapy.  
500 *Future virology* **9**, 811-829, doi:10.2217/fvl.14.70 (2014).
- 501 15 Anwar, M. A., Shah, M., Kim, J. & Choi, S. Recent clinical trends in Toll-like  
502 receptor targeting therapeutics. *Medicinal research reviews* **39**, 1053-1090,  
503 doi:10.1002/med.21553 (2019).
- 504 16 Delaney, T. A. *et al.* Type I IFNs Regulate Inflammation, Vasculopathy, and  
505 Fibrosis in Chronic Cutaneous Graft-versus-Host Disease. *Journal of*  
506 *immunology (Baltimore, Md. : 1950)* **197**, 42-50,  
507 doi:10.4049/jimmunol.1502190 (2016).
- 508 17 Shah, M., Anwar, M. A., Kim, J. H. & Choi, S. Advances in Antiviral Therapies  
509 Targeting Toll-like Receptors. *Expert opinion on investigational drugs* **25**, 437-  
510 453, doi:10.1517/13543784.2016.1154040 (2016).
- 511 18 Bell, J. *et al.* Temporal cytokine and lymphoid responses to an inhaled TLR7  
512 antedrug agonist in the cynomolgus monkey demonstrates potential safety and  
513 tolerability of this approach. *Toxicology and applied pharmacology* **338**, 9-19,  
514 doi:10.1016/j.taap.2017.11.002 (2018).
- 515 19 Wetzler, L. M. The role of Toll-like receptor 2 in microbial disease and immunity.  
516 *Vaccine* **21 Suppl 2**, S55-60, doi:10.1016/s0264-410x(03)00201-9 (2003).
- 517 20 Tan, A. C. L. *et al.* Intranasal Administration of the TLR2 Agonist Pam2Cys  
518 Provides Rapid Protection against Influenza in Mice. *Molecular Pharmaceutics*  
519 **9**, 2710-2718, doi:10.1021/mp300257x (2012).

- 520 21 Chua, B. Y. *et al.* Inactivated Influenza Vaccine That Provides Rapid, Innate-  
521 Immune-System-Mediated Protection and Subsequent Long-Term Adaptive  
522 Immunity. *mBio* **6**, e01024-01015, doi:10.1128/mBio.01024-15 (2015).
- 523 22 Mifsud, E. J., Tan, A. C., Brown, L. E., Chua, B. Y. & Jackson, D. C. Generation  
524 of Adaptive Immune Responses Following Influenza Virus Challenge is Not  
525 Compromised by Pre-Treatment with the TLR-2 Agonist Pam2Cys. *Front*  
526 *Immunol* **6**, 290, doi:10.3389/fimmu.2015.00290 (2015).
- 527 23 Ryan, K. A. *et al.* Dose-dependent response to infection with SARS-CoV-2 in  
528 the ferret model: evidence of protection to re-challenge. *bioRxiv*,  
529 2020.2005.2029.123810, doi:10.1101/2020.05.29.123810 (2020).
- 530 24 Enkirch, T. & von Messling, V. Ferret models of viral pathogenesis. *Virology*  
531 **479-480**, 259-270, doi:10.1016/j.virol.2015.03.017 (2015).
- 532 25 Buhnerkempe, M. G. *et al.* Mapping influenza transmission in the ferret model  
533 to transmission in humans. *eLife* **4**, doi:10.7554/eLife.07969 (2015).
- 534 26 Wan, Y., Shang, J., Graham, R., Baric, R. S. & Li, F. Receptor Recognition by  
535 the Novel Coronavirus from Wuhan: an Analysis Based on Decade-Long  
536 Structural Studies of SARS Coronavirus. *Journal of virology* **94**,  
537 doi:10.1128/jvi.00127-20 (2020).
- 538 27 van den Brand, J. M. A. *et al.* Pathology of Experimental SARS Coronavirus  
539 Infection in Cats and Ferrets. *Veterinary Pathology* **45**, 551-562,  
540 doi:10.1354/vp.45-4-551 (2008).
- 541 28 Shi, J. *et al.* Susceptibility of ferrets, cats, dogs, and other domesticated animals  
542 to SARS-coronavirus 2. *Science (New York, N.Y.)* **368**, 1016-1020,  
543 doi:10.1126/science.abb7015 (2020).
- 544 29 Sungnak, W., Huang, N., Bécavin, C. & Berg, M. SARS-CoV-2 Entry Genes  
545 Are Most Highly Expressed in Nasal Goblet and Ciliated Cells within Human  
546 Airways. *ArXiv* (2020).
- 547 30 Oliveira-Nascimento, L., Massari, P. & Wetzler, L. M. The Role of TLR2 in  
548 Infection and Immunity. *Front Immunol* **3**, 79, doi:10.3389/fimmu.2012.00079  
549 (2012).
- 550 31 McClure, R. & Massari, P. TLR-Dependent Human Mucosal Epithelial Cell  
551 Responses to Microbial Pathogens. *Front Immunol* **5**, 386,  
552 doi:10.3389/fimmu.2014.00386 (2014).

- 553 32 Banner, D. & Kelvin, A. A. The current state of H5N1 vaccines and the use of  
554 the ferret model for influenza therapeutic and prophylactic development.  
555 *Journal of infection in developing countries* **6**, 465-469, doi:10.3855/jidc.2666  
556 (2012).
- 557 33 Park, S. J. *et al.* Antiviral Efficacies of FDA-Approved Drugs against SARS-  
558 CoV-2 Infection in Ferrets. *mBio* **11**, doi:10.1128/mBio.01114-20 (2020).
- 559 34 Moreno-Fierros, L., García-Silva, I. & Rosales-Mendoza, S. Development of  
560 SARS-CoV-2 vaccines: should we focus on mucosal immunity? *Expert opinion*  
561 *on biological therapy*, doi:10.1080/14712598.2020.1767062 (2020).
- 562 35 van Doremalen, N. *et al.* ChAdOx1 nCoV-19 vaccination prevents SARS-CoV-  
563 2 pneumonia in rhesus macaques. *bioRxiv*, doi:10.1101/2020.05.13.093195  
564 (2020).
- 565 36 Buwitt-Beckmann, U. *et al.* TLR1- and TLR6-independent recognition of  
566 bacterial lipopeptides. *The Journal of biological chemistry* **281**, 9049-9057,  
567 doi:10.1074/jbc.M512525200 (2006).
- 568 37 Buschle, M. *et al.* Transloading of tumor antigen-derived peptides into antigen-  
569 presenting cells. *Proceedings of the National Academy of Sciences of the*  
570 *United States of America* **94**, 3256-3261, doi:10.1073/pnas.94.7.3256 (1997).
- 571 38 Nguyen, D. T. *et al.* The synthetic bacterial lipopeptide Pam3CSK4 modulates  
572 respiratory syncytial virus infection independent of TLR activation. *PLoS*  
573 *pathogens* **6**, e1001049, doi:10.1371/journal.ppat.1001049 (2010).
- 574 39 Caly, L. *et al.* Isolation and rapid sharing of the 2019 novel coronavirus (SARS-  
575 CoV-2) from the first patient diagnosed with COVID-19 in Australia. *The Medical*  
576 *journal of Australia* **212**, 459-462, doi:10.5694/mja2.50569 (2020).
- 577 40 Lewandowski, K. *et al.* Metagenomic Nanopore Sequencing of Influenza Virus  
578 Direct from Clinical Respiratory Samples. *Journal of clinical microbiology* **58**,  
579 doi:10.1128/jcm.00963-19 (2019).

580

581

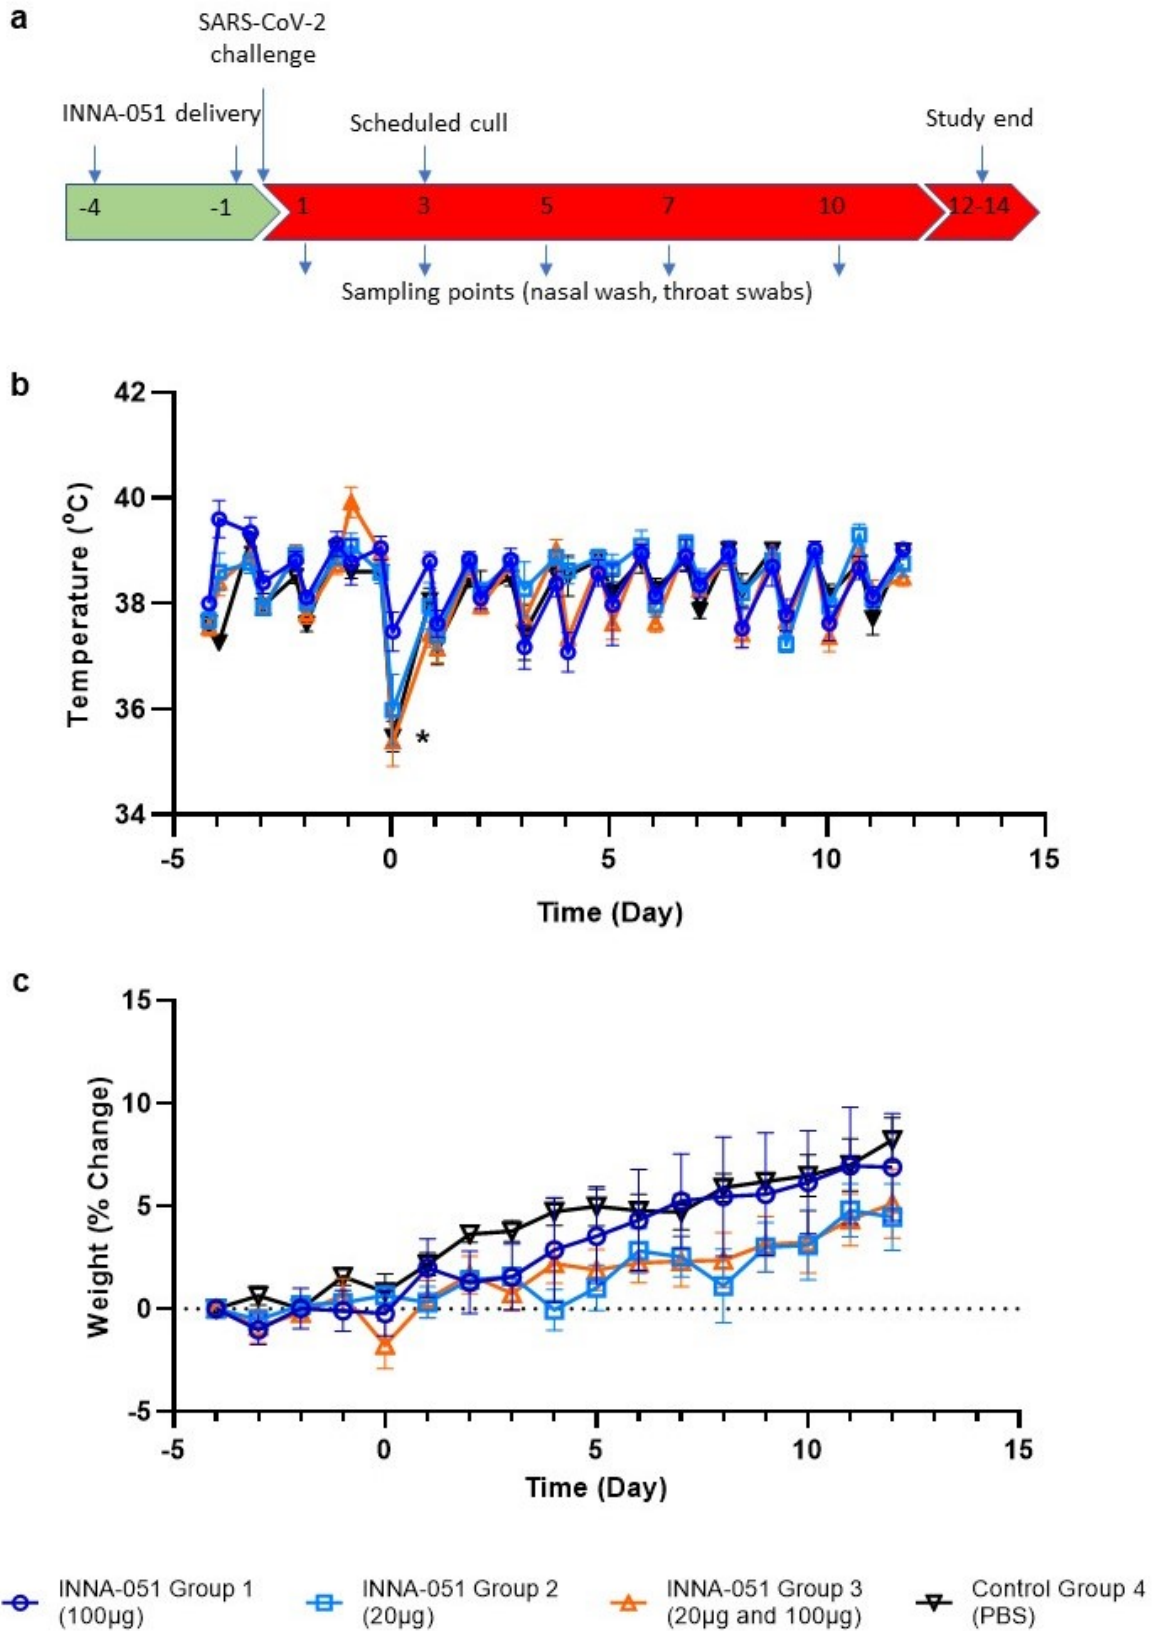

582

583

584 **Figure 1. Clinical observations.** (a) Schematic of experimental design. Ferrets  
585 received INNA-051 and PBS treatments 4 days and 1 day prior to challenge with  $5.0$   
586  $\times 10^6$  pfu/ml SARS-CoV-2. Nasal wash and throat swabs were collected at days 1, 3,  
587 5, 7, 10 & 12 post challenge (p.c.) for all treatment groups and control group.  
588 Scheduled culls were performed for 6/24 ferrets on day 3 p.c. and 18/24 ferrets on  
589 days 12-14 p.c. (b) Temperatures were measured twice daily (approximately 8 hours  
590 apart), using implanted temperature/ID chips. Mean temperatures  $\pm$  standard error  
591 of the mean (SEM) are displayed. Temperature dip post SARS-CoV-2 challenge (\*)  
592 was attributed to sedation. (b) Weight was recorded daily and percentage change from  
593 the ferret weight prior to treatment plotted. Mean percentage weight change  $\pm$  SEM  
594 are displayed.  
595



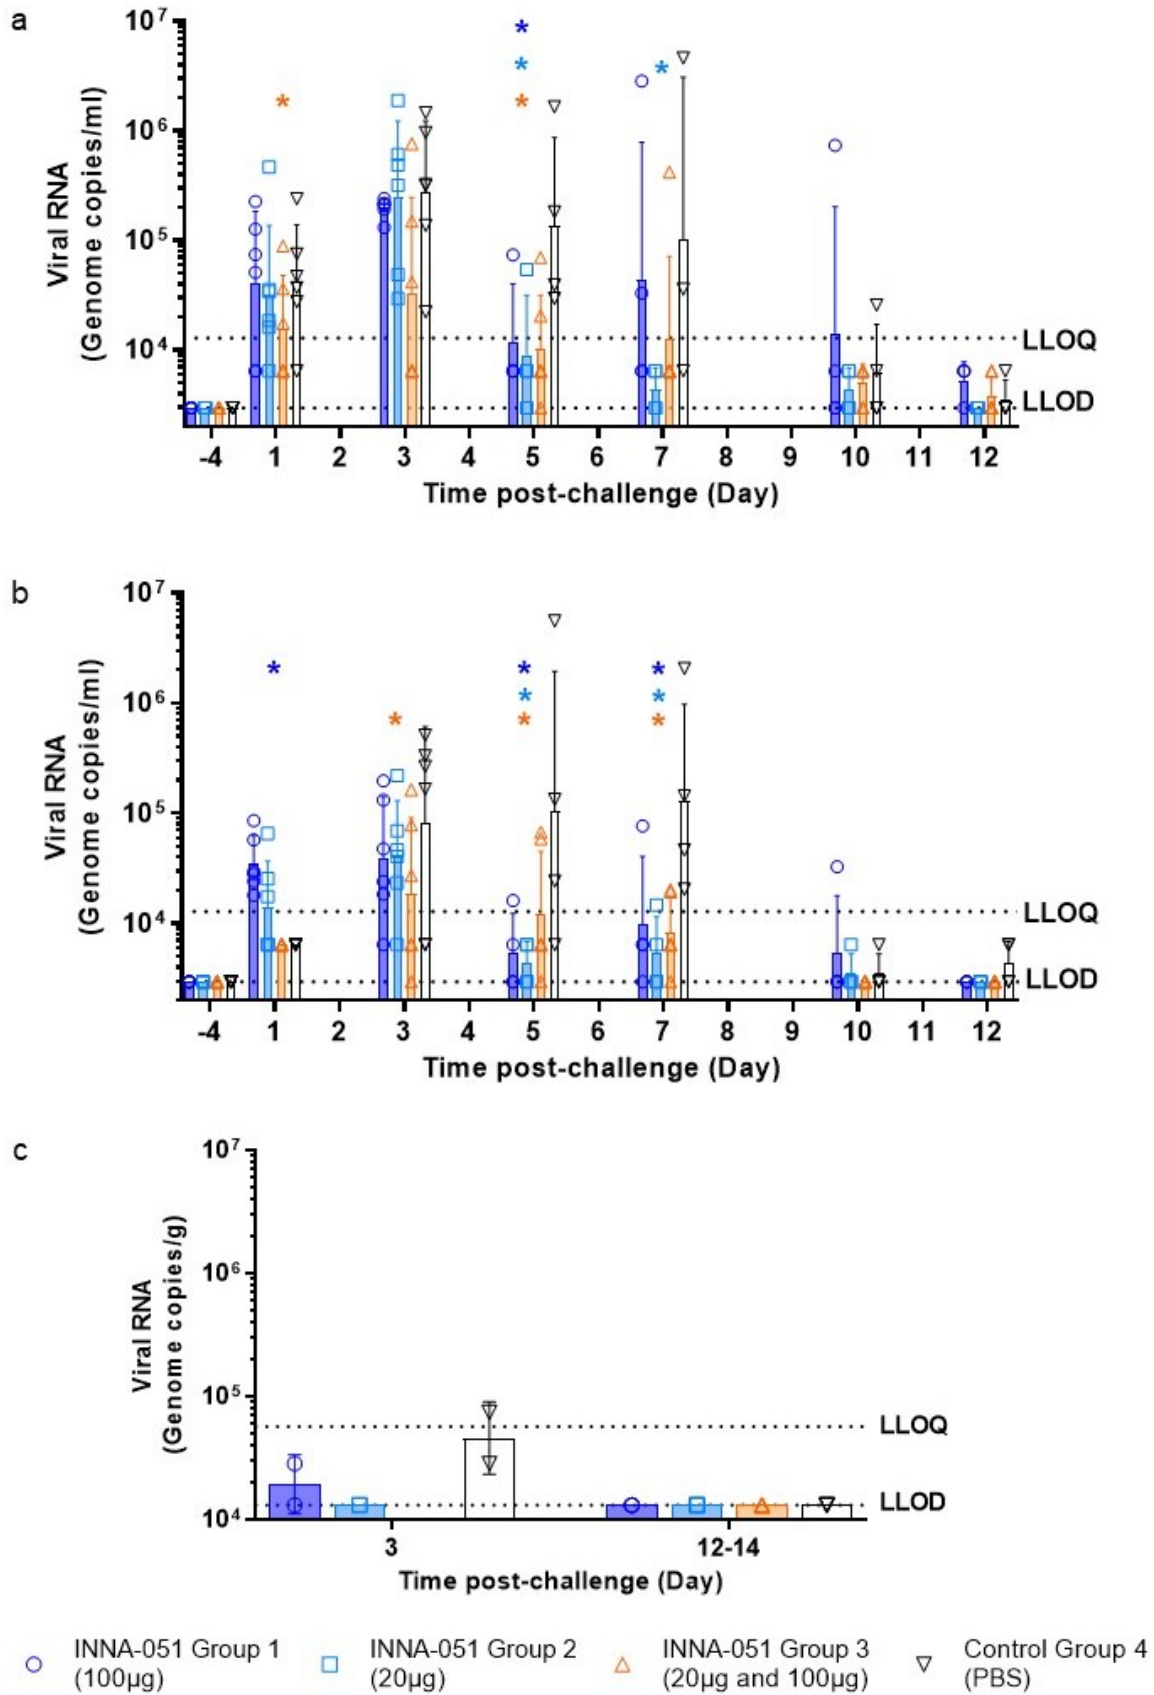

596

597 **Figure 2. Viral RNA shedding following SARS-CoV-2 challenge.** Nasal wash and  
598 throat swabs were collected at days 1, 3, 5, 7, 10 & 12 p.c. for all treatment groups  
599 and vehicle control group. Lung tissue was collected at necropsy on scheduled cull  
600 day 3 (n=6) and end cull days 12-14 (n=18). Viral RNA was quantified by RT-qPCR.  
601 (a) Nasal wash (b) Throat swab (c) Lung tissue. Geometric mean +/- standard  
602 deviation are displayed on the graphs. Dashed horizontal lines denote the lower limit  
603 of quantification (LLOQ) and lower limit of detection (LLOD). Statistical significance  
604 (95% CI of differences) in comparison to the control group using two-way ANOVA  
605 Dunnett's multiple comparisons test are displayed above the error bars (\*). Day 7 nasal  
606 wash for group 4 had viral RNA quantified for 3/4 ferrets; no sample was available for  
607 processing.  
608  
609  
610
